# Supplementary material for: Reduced YTHDF2 inhibits PD-L1 expression by stabilizing m6A-containing SPOP mRNA in colorectal cancer
Source: Research Square preprint supplement (doi:10.21203/rs.3.rs-7735800/v1), 2025-10-28
Supplement: Supplementary file 3 [file fb2f5d4ded7f49003b07bfbd.docx]

Figure 1. Original western blots for Figure 2G.


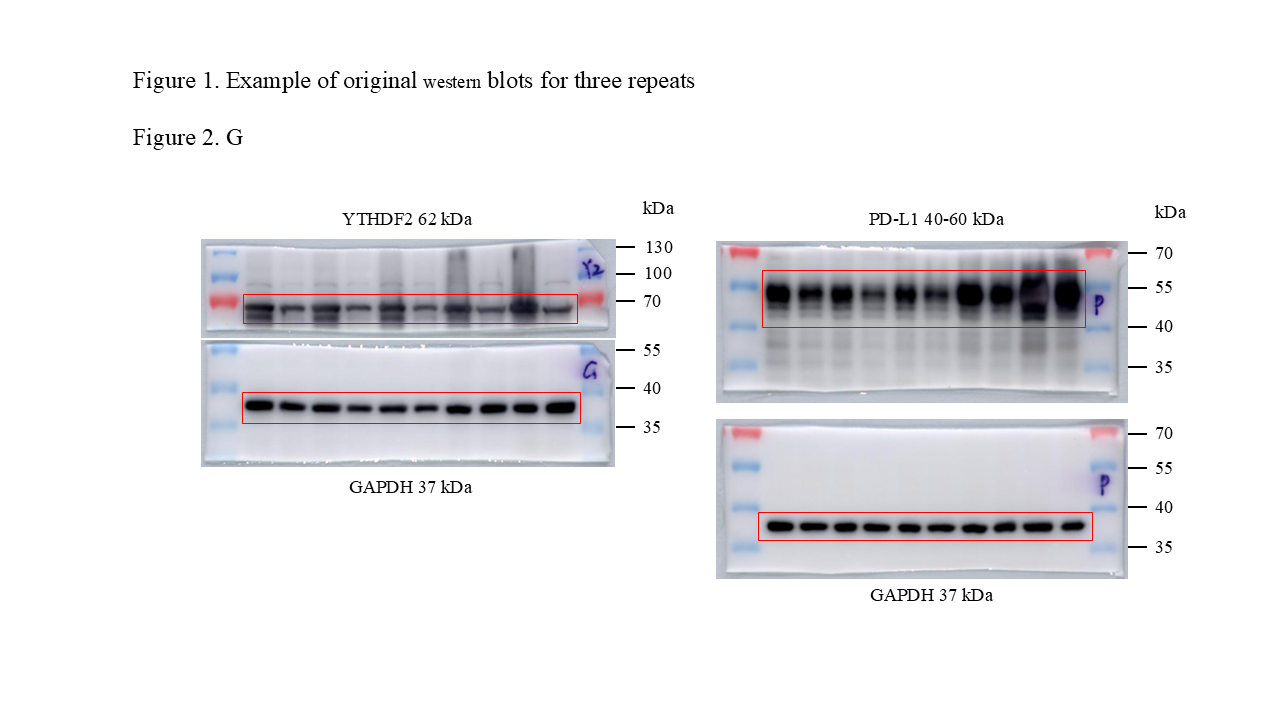


Figure 1 shows the whole blot after cutting membrane at molecular weight 62 kDa, 40-60 kDa and 37 kDa for YTHDF2 (62 kDa), PD-L1 (40-60 kDa) and GAPDH (37 kDa).

Figure 2. Original western blots for Figure 3A.


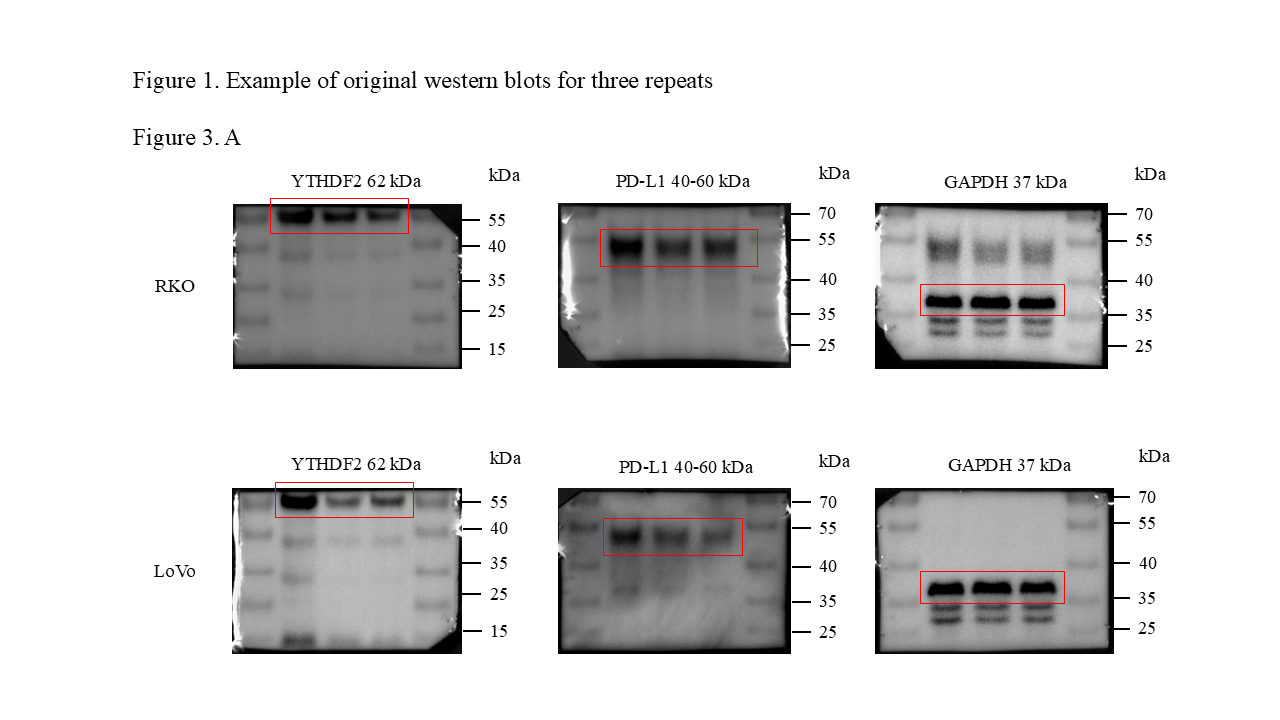


Figure 2 shows the whole blot after cutting membrane at molecular weight 62 kDa, 40-60 kDa and 37 kDa for YTHDF2 (62 kDa), PD-L1 (40-60 kDa) and GAPDH (37 kDa).

Figure 3. Original western blots for Figure 5A.


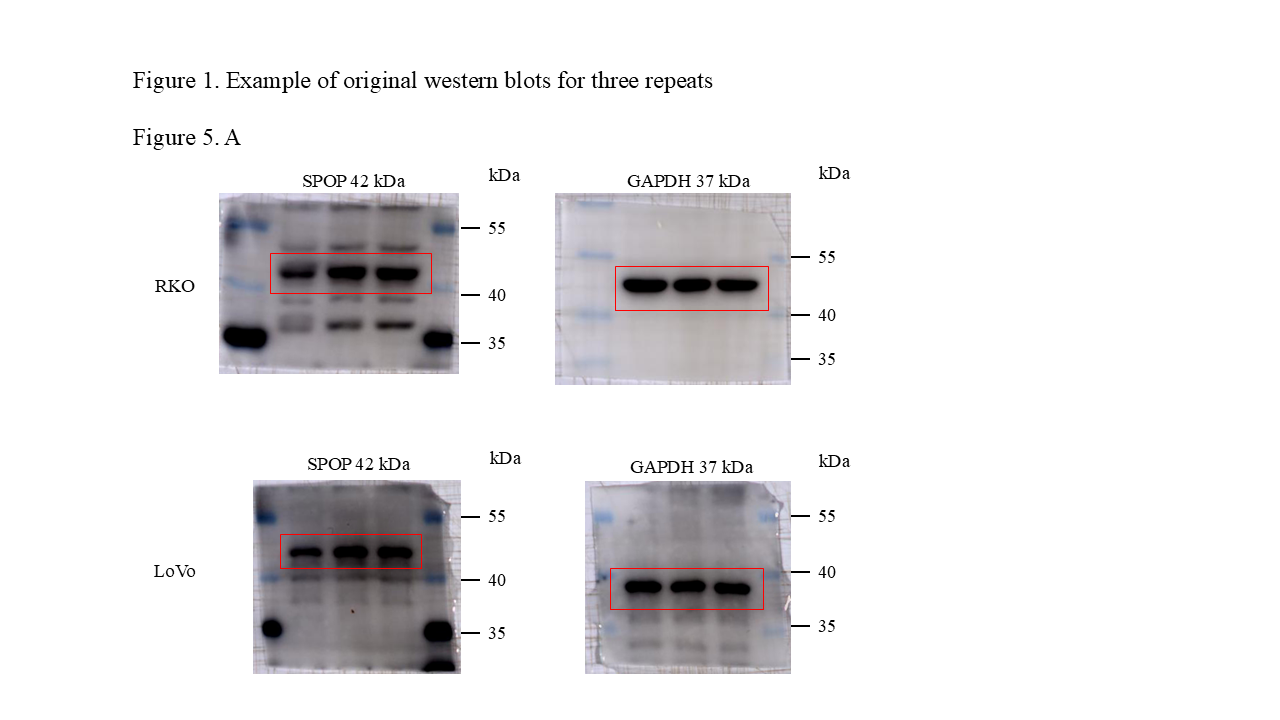


Figure 3 shows the whole blot after cutting membrane at molecular weight 42 kDa and 37 kDa for SPOP (42 kDa) and GAPDH (37 kDa).

Figure 4. Original western blots for Figure 6A.


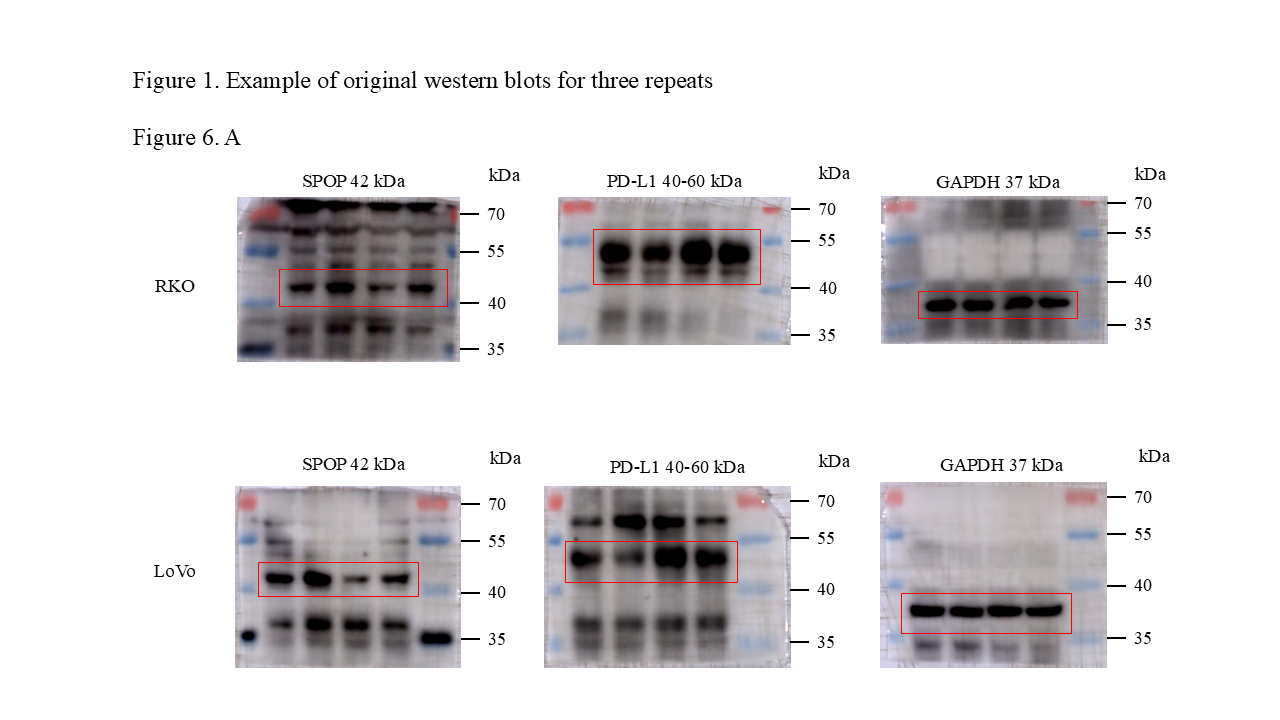


Figure 4 shows the whole blot after cutting membrane at molecular weight 42 kDa, 40-60 kDa and 37 kDa for SPOP (42 kDa), PD-L1 (40-60 kDa) and GAPDH (37 kDa).

Figure 5. Original western blots for Figure S2A.


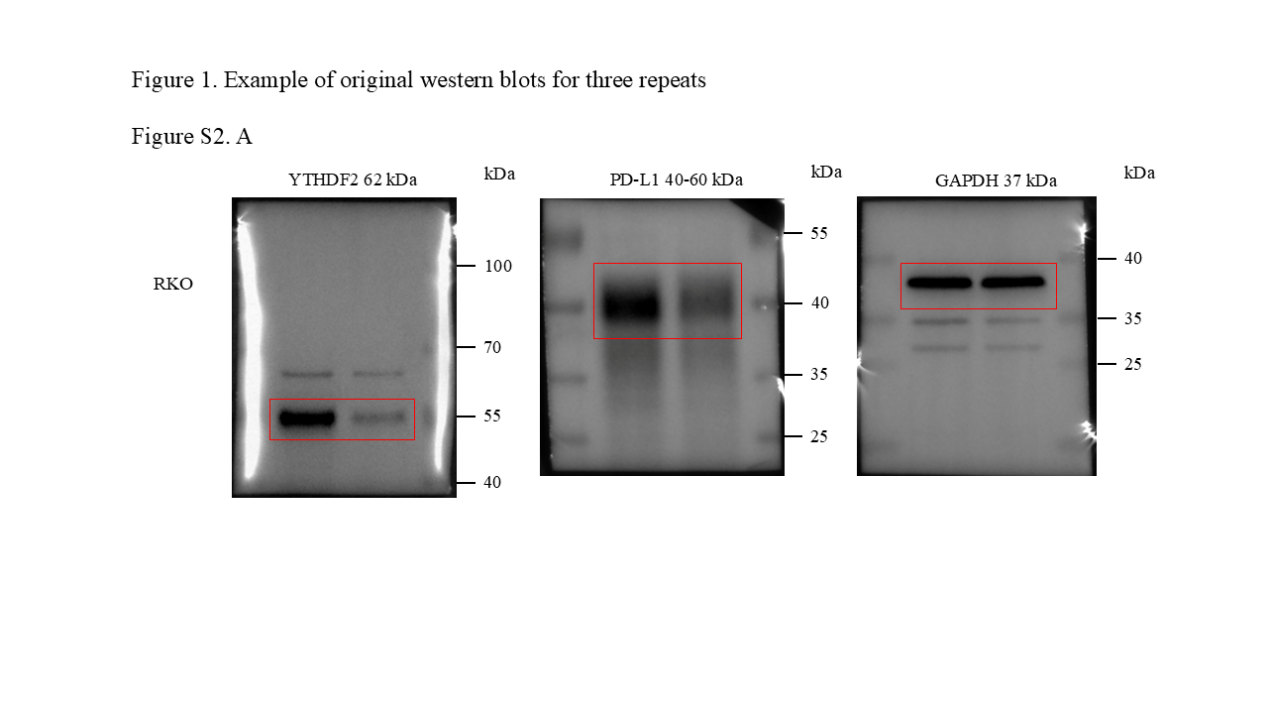


Figure 5 shows the whole blot after cutting membrane at molecular weight 62 kDa, 40-60 kDa and 37 kDa for YTHDF2 (62 kDa), PD-L1 (40-60 kDa) and GAPDH (37 kDa).

Figure 6. Original western blots for Figure S5A.


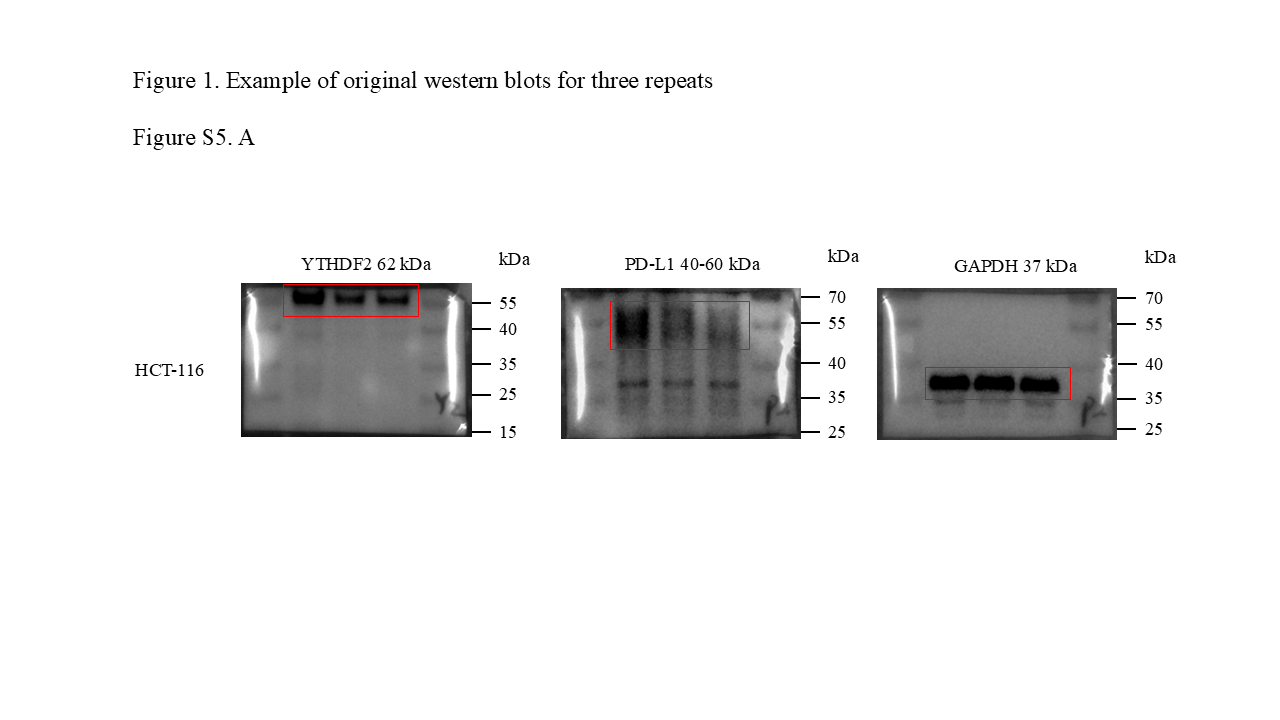


Figure 6 shows the whole blot after cutting membrane at molecular weight 62 kDa, 40-60 kDa and 37 kDa for YTHDF2 (62 kDa), PD-L1 (40-60 kDa) and GAPDH (37 kDa).

Figure 7. Original western blots for Figure S7H.


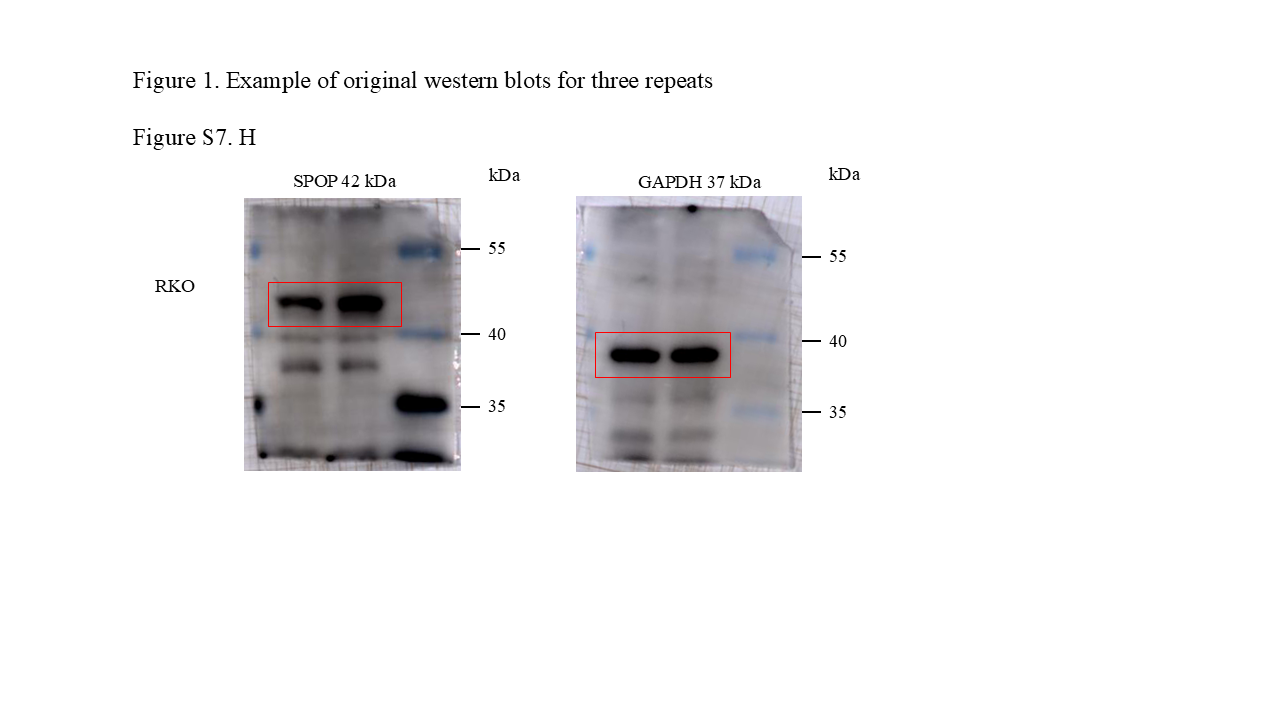


Figure 7 shows the whole blot after cutting membrane at molecular weight 42 kDa and 37 kDa for SPOP (42 kDa) and GAPDH (37 kDa).

Figure 8. Original western blots for Figure S8A.


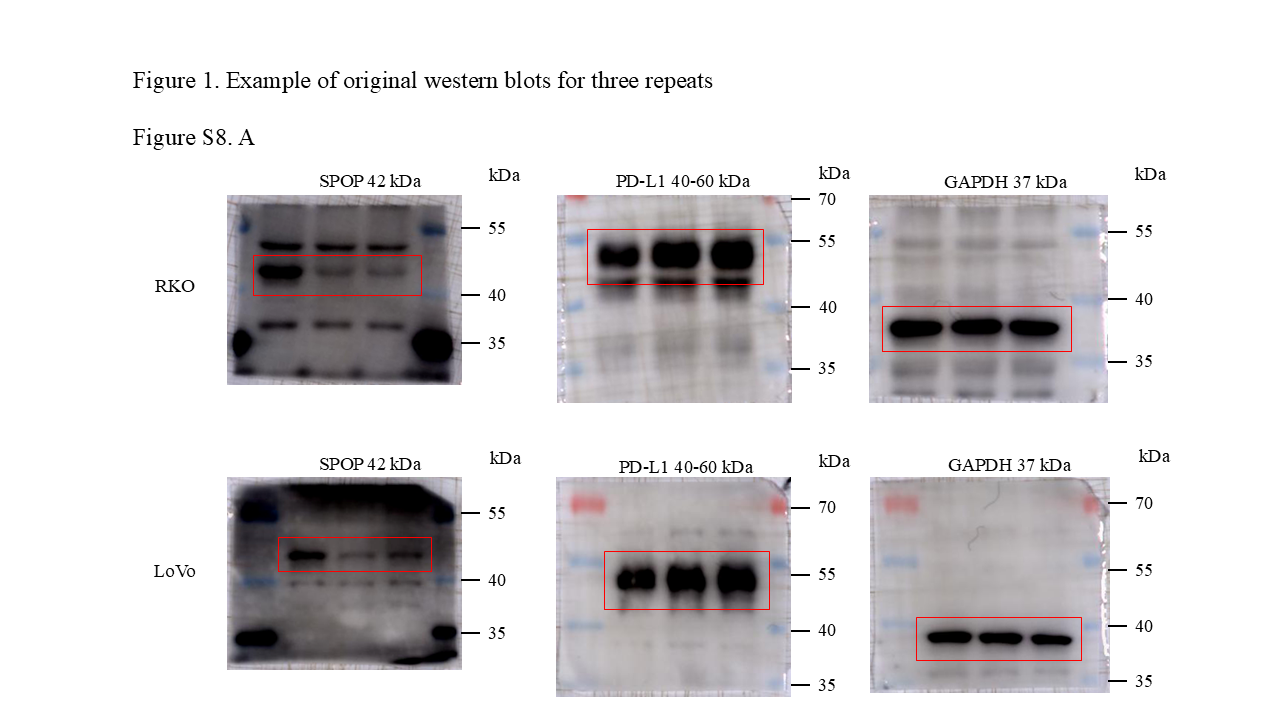


Figure 8 shows the whole blot after cutting membrane at molecular weight 42 kDa, 40-60 kDa and 37 kDa for SPOP (42 kDa), PD-L1 (40-60 kDa) and GAPDH (37 kDa).

Figure 9. Original western blots for Figure S8C.


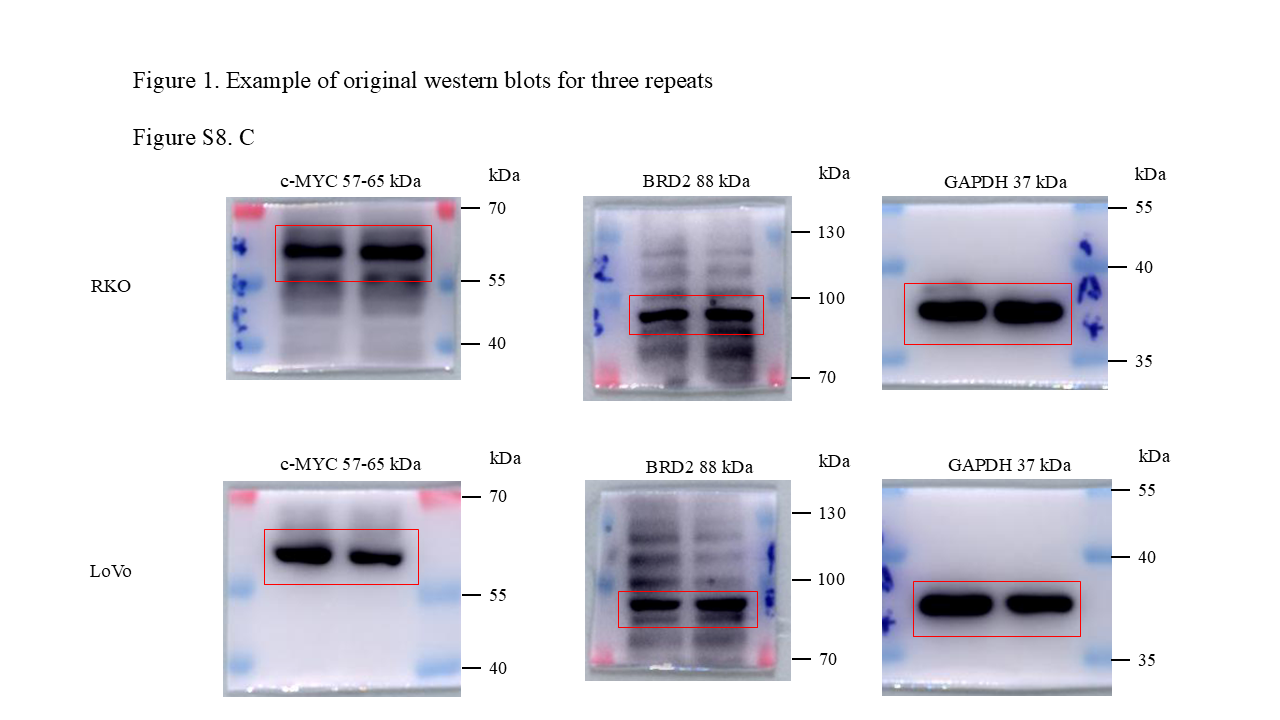


Figure 9 shows the whole blot after cutting membrane at molecular weight 57-65 kDa, 88 kDa and 37 kDa for c-MYC (57-65 kDa), BRD2 (88 kDa) and GAPDH (37 kDa).

Figure 10. Original western blots for Figure S8D.


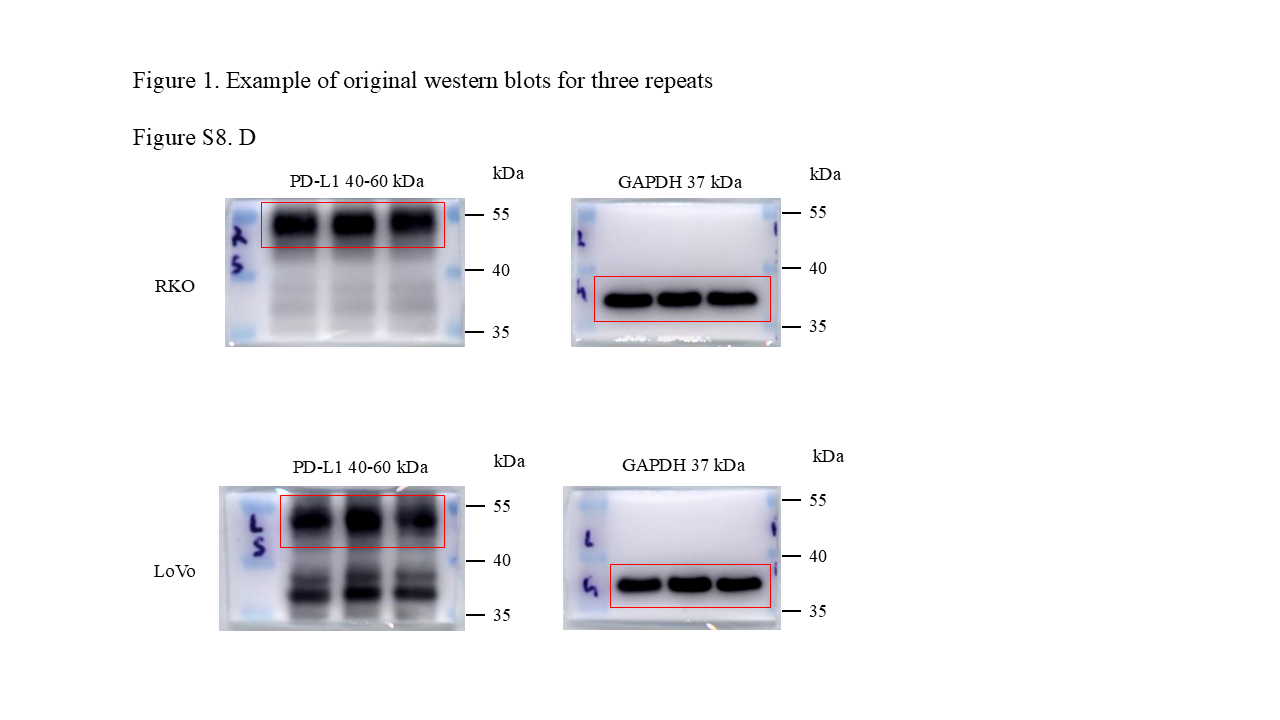


Figure 10 shows the whole blot after cutting membrane at molecular weight 40-60 kDa and 37 kDa for PD-L1 (40-60 kDa) and GAPDH (37 kDa).
